# Supplementary material for: Glucose-to-lactate ratio and neurodevelopment in infants with hypoxic-ischemic encephalopathy: an observational study
Source: PubMed Central journal article supplement (PMC9899169; doi:10.1007/s00431-022-04694-3), 2022-12-09

**Supplemental Figure 1. Consort flow diagram.**

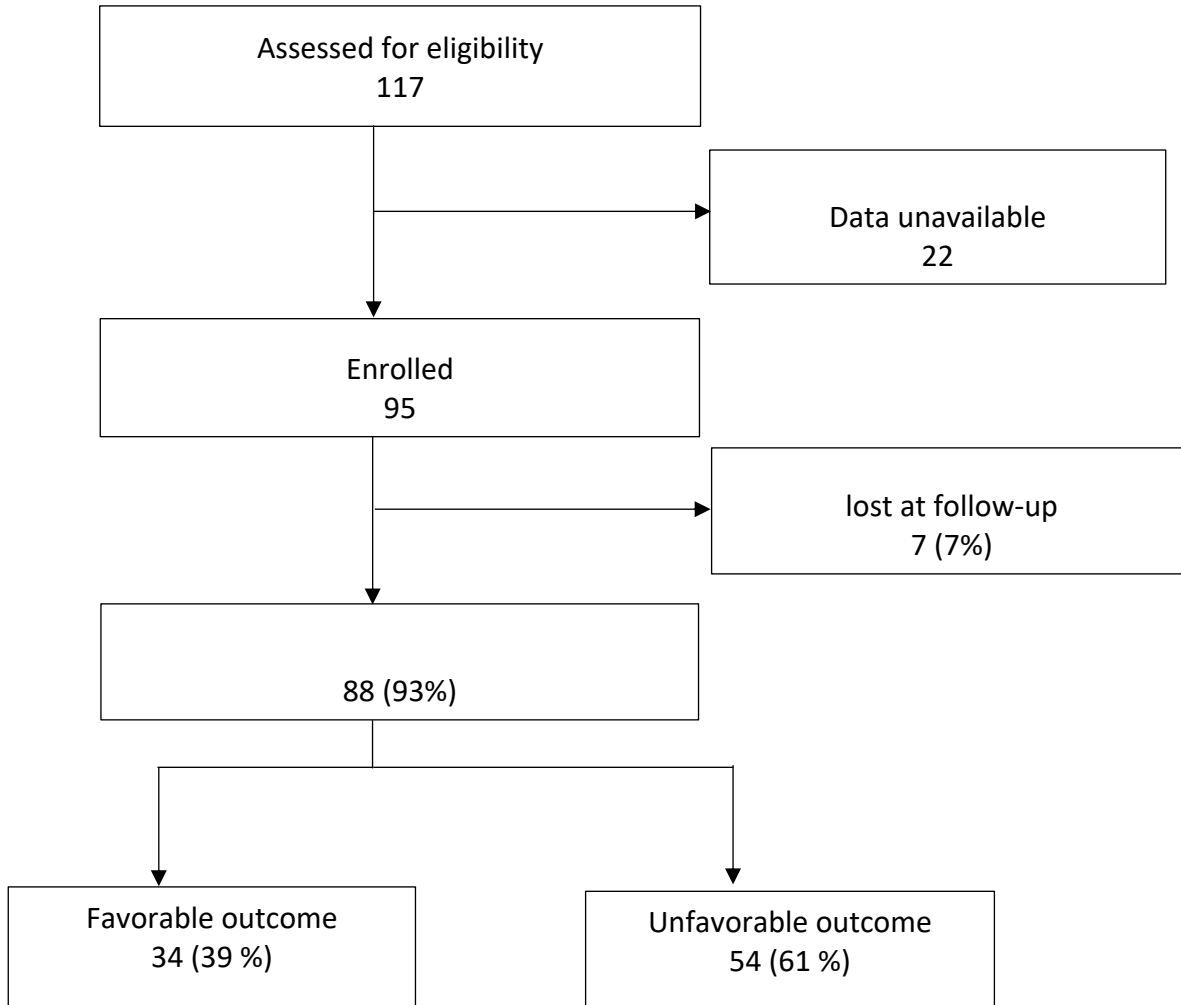

Supplement: 431_2022_4694_MOESM1_ESM.pdf [file 431_2022_4694_MOESM1_ESM.pdf]
